# Supplementary material
Source: PubMed Central journal article supplement (PMC3271812)
Supplement: supp_kwr292_kwr292_Web_Material.pdf [file supp_kwr292_kwr292_Web_Material.pdf]

Web Figure 1: Typical  $^1\text{H}$  NMR urine spectra from participants (A) with no ingestion of analgesics; (B) after ingestion of acetaminophen; (C) after ingestion of ibuprofen.

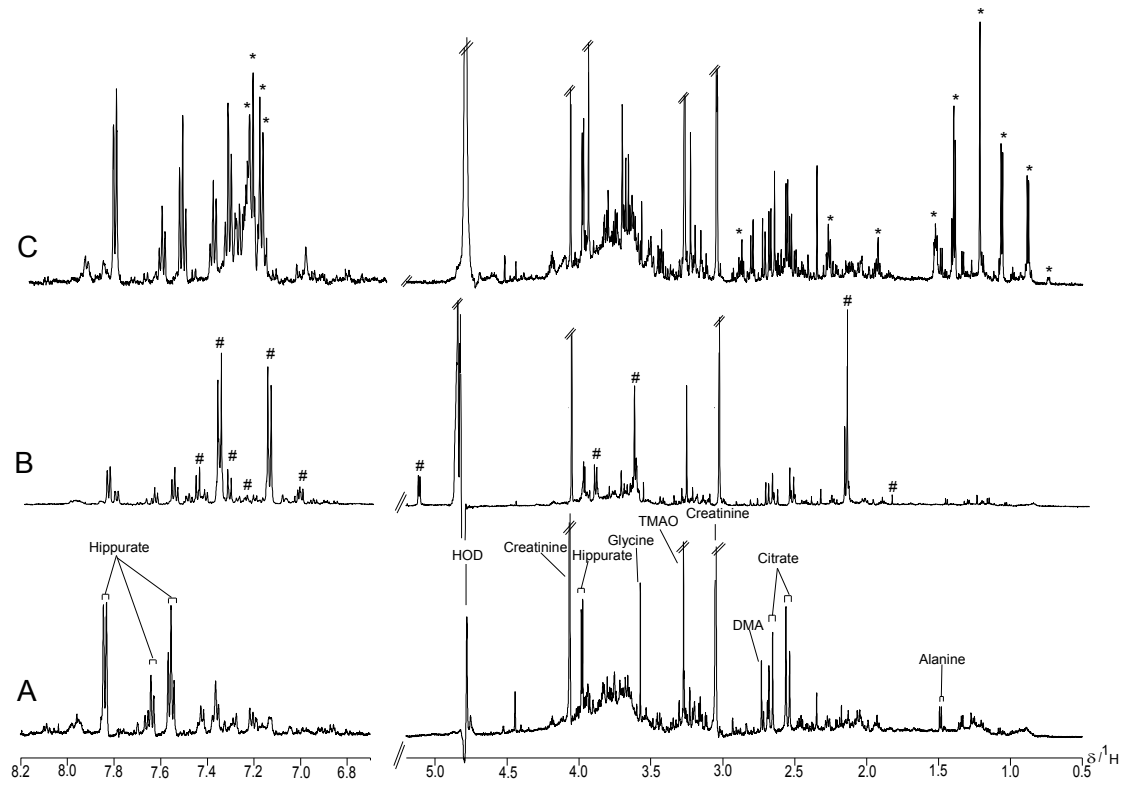

Web Table 1: Prevalence of Acetaminophen and/or Ibuprofen Metabolite Signals Detected in the <sup>1</sup>H NMR Urine Spectra for Western INTERMAP Population Samples, by Gender and Age.

| Sample (total number of participants) | First urine specimen |             |           |             |            |             |            |             |            |             | Second urine specimen |             |            |             |            |             |            |             |            |             |
|---------------------------------------|----------------------|-------------|-----------|-------------|------------|-------------|------------|-------------|------------|-------------|-----------------------|-------------|------------|-------------|------------|-------------|------------|-------------|------------|-------------|
|                                       | Men                  |             |           |             |            | Women       |            |             |            |             | Men                   |             |            |             |            | Women       |            |             |            |             |
|                                       | Ages                 |             | Ages      |             | Subtotal   | Ages        |            | Ages        |            | Subtotal    | Ages                  |             | Ages       |             | Subtotal   | Ages        |            | Ages        |            | Subtotal    |
|                                       | 40-49                | 50-59       | 40-49     | 50-59       |            | 40-49       | 50-59      | 40-49       | 50-59      |             | 40-49                 | 50-59       | 40-49      | 50-59       |            | 40-49       | 50-59      | 40-49       | 50-59      |             |
| N                                     | %                    | N           | %         | N           | %          | N           | %          | N           | %          | N           | %                     | N           | %          | N           | %          | N           | %          | N           | %          |             |
| Belfast (N=220)                       | 3                    | 5.1         | 5         | 7.6         | 11         | 17.5        | 5          | 15.6        | 24         | 10.9        | 5                     | 8.5         | 4          | 6.1         | 8          | 12.7        | 6          | 18.8        | 23         | 10.5        |
| West Bromwich (N=276)                 | 10                   | 13.5        | 9         | 13.6        | 11         | 16.9        | 16         | 22.5        | 46         | 16.7        | 8                     | 10.8        | 14         | 21.2        | 12         | 18.5        | 19         | 26.8        | 53         | 19.2        |
| <i>United Kingdom (N=496)</i>         | <i>13</i>            | <i>9.8</i>  | <i>14</i> | <i>10.6</i> | <i>22</i>  | <i>17.2</i> | <i>21</i>  | <i>20.4</i> | <i>70</i>  | <i>14.1</i> | <i>13</i>             | <i>9.8</i>  | <i>18</i>  | <i>13.6</i> | <i>20</i>  | <i>15.6</i> | <i>25</i>  | <i>24.3</i> | <i>76</i>  | <i>15.3</i> |
| Baltimore (N=274)                     | 7                    | 9.9         | 15        | 20.8        | 17         | 26.6        | 7          | 10.4        | 46         | 16.8        | 7                     | 9.9         | 11         | 15.3        | 10         | 15.6        | 14         | 20.9        | 42         | 15.3        |
| Chicago (N=315)                       | 5                    | 6.7         | 18        | 22.2        | 9          | 11.4        | 15         | 18.8        | 47         | 14.9        | 7                     | 9.3         | 14         | 17.3        | 13         | 16.5        | 9          | 11.3        | 43         | 13.7        |
| Honolulu (N=257)                      | 4                    | 6.8         | 4         | 5.9         | 5          | 7.6         | 7          | 10.9        | 20         | 7.8         | 1                     | 1.7         | 7          | 10.3        | 6          | 9.1         | 10         | 15.6        | 24         | 9.3         |
| Jackson (N=261)                       | 4                    | 6.5         | 15        | 22.4        | 12         | 17.9        | 17         | 26.2        | 48         | 18.4        | 8                     | 12.9        | 14         | 20.9        | 19         | 28.4        | 13         | 20.0        | 54         | 20.7        |
| Minneapolis (N=260)                   | 8                    | 12.3        | 9         | 13.8        | 13         | 20.0        | 18         | 27.7        | 48         | 18.5        | 5                     | 7.7         | 11         | 16.9        | 12         | 18.5        | 18         | 27.7        | 46         | 17.7        |
| Pittsburgh (N=259)                    | 14                   | 20.9        | 7         | 10.8        | 16         | 25.8        | 18         | 27.7        | 55         | 21.2        | 18                    | 26.9        | 11         | 16.9        | 11         | 17.7        | 25         | 38.5        | 65         | 25.1        |
| Corpus Christi, Hispanic (N=268)      | 8                    | 11.9        | 5         | 7.7         | 10         | 14.1        | 19         | 29.2        | 42         | 15.7        | 11                    | 16.4        | 10         | 15.4        | 18         | 25.4        | 17         | 26.2        | 56         | 20.9        |
| Corpus Christi, Non-Hispanic (N=270)  | 10                   | 14.5        | 11        | 16.4        | 18         | 26.9        | 22         | 32.8        | 61         | 22.6        | 10                    | 14.5        | 10         | 14.9        | 18         | 26.9        | 21         | 31.3        | 59         | 21.9        |
| <i>United States (N=2,164)</i>        | <i>60</i>            | <i>11.2</i> | <i>84</i> | <i>15.3</i> | <i>100</i> | <i>18.5</i> | <i>123</i> | <i>22.9</i> | <i>367</i> | <i>17.0</i> | <i>67</i>             | <i>12.5</i> | <i>88</i>  | <i>16.0</i> | <i>107</i> | <i>19.8</i> | <i>127</i> | <i>23.6</i> | <i>389</i> | <i>18.0</i> |
| <b>Western Region (N=2,660)</b>       | <b>73</b>            | <b>10.9</b> | <b>98</b> | <b>14.4</b> | <b>122</b> | <b>18.2</b> | <b>144</b> | <b>22.5</b> | <b>437</b> | <b>16.4</b> | <b>80</b>             | <b>12.0</b> | <b>106</b> | <b>15.5</b> | <b>127</b> | <b>19.0</b> | <b>152</b> | <b>23.7</b> | <b>465</b> | <b>17.5</b> |

Web Table 2: Prevalence of Self-reported Analgesic Use\* for Western INTERMAP Population Samples, by Gender and Age.

|                                              | First visit |            |            |             |           |            |           |             |            |             | Third visit |            |            |             |           |            |           |             |            |             |
|----------------------------------------------|-------------|------------|------------|-------------|-----------|------------|-----------|-------------|------------|-------------|-------------|------------|------------|-------------|-----------|------------|-----------|-------------|------------|-------------|
|                                              | Men         |            |            |             |           | Women      |           |             |            |             | Men         |            |            |             |           | Women      |           |             |            |             |
|                                              | Ages        |            | Ages       |             | Ages      |            | Ages      |             | Subtotal   |             | Ages        |            | Ages       |             | Ages      |            | Ages      |             | Subtotal   |             |
|                                              | 40-49       | 50-59      | 40-49      | 50-59       | 40-49     | 50-59      | 40-49     | 50-59       | N          | %           | 40-49       | 50-59      | 40-49      | 50-59       | 40-49     | 50-59      | 40-49     | 50-59       | N          | %           |
| <b>Sample (total number of participants)</b> | <b>N</b>    | <b>%</b>   | <b>N</b>   | <b>%</b>    | <b>N</b>  | <b>%</b>   | <b>N</b>  | <b>%</b>    | <b>N</b>   | <b>%</b>    | <b>N</b>    | <b>%</b>   | <b>N</b>   | <b>%</b>    | <b>N</b>  | <b>%</b>   | <b>N</b>  | <b>%</b>    | <b>N</b>   | <b>%</b>    |
| Belfast (N=220)                              | 2           | 3.4        | 6          | 9.1         | 3         | 4.8        | 3         | 9.4         | 14         | 6.4         | 2           | 3.4        | 4          | 6.1         | 4         | 6.3        | 1         | 3.1         | 11         | 5.0         |
| West Bromwich (N=276)                        | 8           | 10.8       | 9          | 13.6        | 3         | 4.6        | 5         | 7.0         | 25         | 9.1         | 5           | 6.8        | 6          | 9.1         | 3         | 4.6        | 10        | 14.1        | 24         | 8.7         |
| <i>United Kingdom (N=496)</i>                | <i>10</i>   | <i>7.5</i> | <i>15</i>  | <i>11.4</i> | <i>6</i>  | <i>4.7</i> | <i>8</i>  | <i>7.8</i>  | <i>39</i>  | <i>7.9</i>  | <i>7</i>    | <i>5.3</i> | <i>10</i>  | <i>7.6</i>  | <i>7</i>  | <i>5.5</i> | <i>11</i> | <i>10.7</i> | <i>35</i>  | <i>7.0</i>  |
| Baltimore (N=274)                            | 1           | 1.4        | 8          | 11.1        | 3         | 4.7        | 6         | 9.0         | 18         | 6.6         | 1           | 1.4        | 12         | 16.7        | 3         | 4.7        | 6         | 9.0         | 22         | 8.0         |
| Chicago (N=315)                              | 9           | 12.0       | 27         | 33.3        | 10        | 12.7       | 12        | 15.0        | 58         | 18.4        | 7           | 9.3        | 24         | 29.6        | 7         | 8.9        | 10        | 12.5        | 48         | 15.2        |
| Honolulu (N=257)                             | 1           | 1.7        | 2          | 2.9         | 2         | 3.0        | 4         | 6.3         | 9          | 3.5         | 2           | 3.4        | 3          | 4.4         | 1         | 1.5        | 3         | 4.7         | 9          | 3.5         |
| Jackson (N=261)                              | 3           | 4.8        | 5          | 7.5         | 3         | 4.5        | 3         | 4.6         | 14         | 5.4         | 3           | 4.8        | 2          | 3.0         | 2         | 3.0        | 4         | 6.2         | 11         | 4.2         |
| Minneapolis (N=260)                          | 4           | 6.2        | 17         | 26.2        | 8         | 12.3       | 18        | 27.7        | 47         | 18.1        | 5           | 7.7        | 16         | 24.6        | 7         | 10.8       | 21        | 32.3        | 49         | 18.8        |
| Pittsburgh (N=259)                           | 12          | 17.9       | 15         | 23.1        | 10        | 16.1       | 16        | 24.6        | 53         | 20.5        | 13          | 19.4       | 14         | 21.5        | 8         | 12.9       | 11        | 16.9        | 46         | 17.8        |
| Corpus Christi, Hispanic (N=268)             | 4           | 6.0        | 3          | 4.6         | 6         | 8.5        | 12        | 18.5        | 25         | 9.3         | 4           | 6.0        | 7          | 10.8        | 14        | 19.7       | 11        | 16.9        | 36         | 13.4        |
| Corpus Christi, Non-Hispanic (N=270)         | 8           | 11.6       | 10         | 14.9        | 8         | 11.9       | 16        | 23.9        | 42         | 15.6        | 8           | 11.6       | 13         | 19.4        | 8         | 11.9       | 13        | 19.4        | 42         | 15.6        |
| <i>United States (N=2,164)</i>               | <i>42</i>   | <i>7.9</i> | <i>87</i>  | <i>15.8</i> | <i>50</i> | <i>9.2</i> | <i>87</i> | <i>16.2</i> | <i>266</i> | <i>12.3</i> | <i>43</i>   | <i>8.0</i> | <i>91</i>  | <i>16.5</i> | <i>50</i> | <i>9.2</i> | <i>79</i> | <i>14.7</i> | <i>263</i> | <i>12.2</i> |
| <b>Western Region (N=2,660)</b>              | <b>52</b>   | <b>7.8</b> | <b>102</b> | <b>15.0</b> | <b>56</b> | <b>8.4</b> | <b>95</b> | <b>13.9</b> | <b>305</b> | <b>11.5</b> | <b>50</b>   | <b>7.5</b> | <b>101</b> | <b>14.8</b> | <b>58</b> | <b>8.7</b> | <b>90</b> | <b>14.0</b> | <b>298</b> | <b>11.2</b> |

\* Self-reported analgesic use (yes/no)

Web Table 3: Prevalence of Acetaminophen and/or Ibuprofen Metabolite Signals Detected in the <sup>1</sup>H NMR Urine Spectra for Asian INTERMAP Population Samples, by Gender and Age.

| Sample (total number of participants) | First urine specimen |            |            |            |           |            |           |            |           |            | Second urine specimen |            |            |            |           |            |          |            |           |            |
|---------------------------------------|----------------------|------------|------------|------------|-----------|------------|-----------|------------|-----------|------------|-----------------------|------------|------------|------------|-----------|------------|----------|------------|-----------|------------|
|                                       | Men                  |            |            |            |           | Women      |           |            |           |            | Men                   |            |            |            |           | Women      |          |            |           |            |
|                                       | Ages 40-49           |            | Ages 50-59 |            | Subtotal  | Ages 40-49 |           | Ages 50-59 |           | Subtotal   | Ages 40-49            |            | Ages 50-59 |            | Subtotal  | Ages 40-49 |          | Ages 50-59 |           | Subtotal   |
|                                       | N                    | %          | N          | %          |           | N          | %         | N          | %         |            | N                     | %          | N          | %          |           | N          | %        | N          | %         |            |
| Toyama (N=298)                        | 0                    | 0          | 1          | 1.3        | 3         | 3.9        | 2         | 2.7        | 6         | 2.0        | 1                     | 1.4        | 1          | 1.3        | 3         | 3.9        | 2        | 2.7        | 7         | 2.3        |
| Sapporo (N=294)                       | 1                    | 1.3        | 0          | 0          | 0         | 0          | 1         | 1.4        | 2         | 0.7        | 0                     | 0          | 0          | 0          | 2         | 2.7        | 2        | 2.7        | 4         | 1.4        |
| Aito Town (N=259)                     | 1                    | 1.5        | 2          | 3.2        | 4         | 6.1        | 1         | 1.6        | 8         | 3.1        | 2                     | 2.9        | 0          | 0          | 3         | 4.5        | 0        | 0          | 5         | 1.9        |
| Wakayama (N=287)                      | 1                    | 1.4        | 0          | 0          | 0         | 0          | 4         | 6.1        | 5         | 1.7        | 1                     | 1.4        | 0          | 0          | 1         | 1.3        | 0        | 0          | 2         | 0.7        |
| <i>Japan (N=1,138)</i>                | 3                    | 1.0        | 3          | 1.1        | 7         | 2.4        | 8         | 2.9        | 21        | 1.8        | 4                     | 1.4        | 1          | 0.4        | 9         | 3.1        | 4        | 1.4        | 18        | 1.6        |
| Beijing (N=272)                       | 5                    | 7.5        | 1          | 1.5        | 2         | 2.9        | 3         | 4.3        | 11        | 4.0        | 3                     | 4.5        | 1          | 1.5        | 2         | 2.9        | 2        | 2.9        | 8         | 2.9        |
| Guangxi (N=277)                       | 3                    | 4.3        | 0          | 0          | 3         | 4.3        | 3         | 4.4        | 9         | 3.2        | 0                     | 0          | 3          | 4.3        | 2         | 2.9        | 0        | 0          | 5         | 1.8        |
| Shanxi (N=283)                        | 0                    | 0          | 3          | 4.3        | 0         | 0          | 4         | 6.0        | 7         | 2.5        | 3                     | 4.1        | 2          | 2.9        | 4         | 5.5        | 2        | 3.0        | 11        | 3.9        |
| <i>China (N=832)</i>                  | 8                    | 3.8        | 4          | 1.9        | 5         | 2.4        | 10        | 4.9        | 27        | 3.2        | 6                     | 2.9        | 6          | 2.9        | 8         | 3.8        | 4        | 2.0        | 24        | 2.9        |
| <b><i>Asian Region (N=1,970)</i></b>  | <b>11</b>            | <b>2.2</b> | <b>7</b>   | <b>1.4</b> | <b>12</b> | <b>2.4</b> | <b>18</b> | <b>3.7</b> | <b>48</b> | <b>2.4</b> | <b>10</b>             | <b>2.0</b> | <b>7</b>   | <b>1.4</b> | <b>17</b> | <b>3.4</b> | <b>8</b> | <b>1.7</b> | <b>42</b> | <b>2.1</b> |

Web Table 4: Prevalence of Self-reported Analgesic Use\* for Asian Population Samples, by Gender and Age.

| Sample (total number of participants) | First visit |     |            |     |          |            |    |            |    |          | Third visit |     |            |     |          |            |    |            |    |          |
|---------------------------------------|-------------|-----|------------|-----|----------|------------|----|------------|----|----------|-------------|-----|------------|-----|----------|------------|----|------------|----|----------|
|                                       | Men         |     |            |     |          | Women      |    |            |    |          | Men         |     |            |     |          | Women      |    |            |    |          |
|                                       | Ages 40-49  |     | Ages 50-59 |     | Subtotal | Ages 40-49 |    | Ages 50-59 |    | Subtotal | Ages 40-49  |     | Ages 50-59 |     | Subtotal | Ages 40-49 |    | Ages 50-59 |    | Subtotal |
|                                       | N           | %   | N          | %   |          | N          | %  | N          | %  |          | N           | %   | N          | %   |          | N          | %  | N          | %  |          |
| Toyama (N=298)                        | 0           | 0   | 1          | 1.3 | 0        | 0          | 0  | 0          | 1  | 0.3      | 0           | 0   | 1          | 1.3 | 0        | 0          | 1  | 1.4        | 2  | 0.7      |
| Sapporo (N=294)                       | 2           | 2.7 | 0          | 0   | 2        | 2.7        | 0  | 0          | 4  | 1.4      | 1           | 1.3 | 1          | 1.4 | 1        | 1.4        | 0  | 0          | 3  | 1.0      |
| Aito Town (N=259)                     | 0           | 0   | 3          | 4.8 | 2        | 3.0        | 3  | 4.8        | 8  | 3.1      | 1           | 1.5 | 1          | 1.6 | 1        | 1.5        | 1  | 1.6        | 4  | 1.5      |
| Wakayama (N=287)                      | 0           | 0   | 0          | 0   | 1        | 1.3        | 1  | 1.5        | 2  | 0.7      | 0           | 0   | 1          | 1.4 | 0        | 0          | 0  | 0          | 1  | 0.3      |
| Japan (N=1,138)**                     | 2           | 0.7 | 4          | 1.4 | 5        | 1.7        | 4  | 1.4        | 15 | 1.3      | 2           | 0.7 | 4          | 1.4 | 2        | 0.7        | 2  | 0.7        | 10 | 0.9      |
| Beijing (N=272)                       | 1           | 1.5 | 2          | 3   | 1        | 1.4        | 2  | 2.9        | 6  | 2.2      | 0           | 0   | 2          | 3.0 | 0        | 0          | 0  | 0          | 2  | 0.7      |
| Guangxi (N=277)                       | 0           | 0   | 0          | 0   | 1        | 1.4        | 0  | 0          | 1  | 0.4      | 1           | 1.4 | 0          | 0   | 1        | 1.4        | 0  | 0          | 2  | 0.7      |
| Shanxi (N=283)                        | 2           | 2.7 | 3          | 4.3 | 3        | 4.1        | 4  | 6          | 12 | 4.2      | 3           | 4.1 | 4          | 5.7 | 5        | 6.8        | 14 | 20.9       | 26 | 9.2      |
| China (N=832)                         | 3           | 1.4 | 5          | 2.4 | 5        | 2.4        | 6  | 2.9        | 19 | 2.3      | 4           | 1.9 | 6          | 2.9 | 6        | 2.8        | 14 | 6.9        | 30 | 3.6      |
| Asian Region (N=1,970)                | 5           | 1.0 | 9          | 1.8 | 10       | 2.0        | 10 | 2.1        | 34 | 1.7      | 6           | 1.2 | 10         | 2.0 | 8        | 1.6        | 16 | 3.3        | 40 | 2.0      |

\* Self-reported analgesic use (yes/no)

\*\*Data were missing for six Japanese participants; these individuals were classified as non-users.
